# Supplementary material for: 1-Naphthylamine functionalized Pt nanoparticles: electrochemical activity and redox chemistry occurring on one surface
Source: Royal Society of Chemistry journal article supplement (doi:10.1039/c4nj02040e), 2015-01-01
Supplement: c4nj02040e1.pdf [file c4nj02040e1.pdf]

## Supporting Information

### 1-Naphthylamine functionalized Pt nanoparticles: Electrochemical activity and redox chemistry occurring on one surface

*Eva Morsbach<sup>1</sup>, Markus Nesselberger<sup>2</sup>, Jonas Warneke<sup>1</sup>, Philipp Harz<sup>1</sup>, Matthias Arenz<sup>2</sup>, Marcus Bäumer<sup>1</sup>, Sebastian Kunz<sup>1\*</sup>*

<sup>1</sup> IAPC (Institute of Applied and Physical Chemistry), University of Bremen, Leobener Str. NW2, 28359 Bremen, Germany; <sup>2</sup> Nano-Science Center, Department of Chemistry, University of Copenhagen, Universitetsparken 5, 2100 Copenhagen, Denmark

Content:

TEM images of 1-naphthylamine functionalized Pt NPs

Transmission-IR spectrum of unfunctionalized Pt NPs dispersed in THF

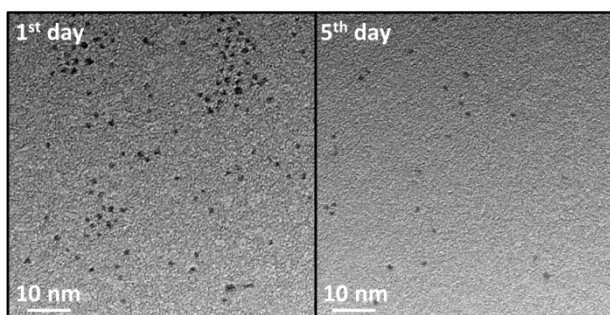

*Figure S1: TEM images of NA-Pt NPs on day 1 and day 5 of activation period.*

*Table S1: Average NP diameter of NA-Pt NPs over the activation period. At least 200 particles were measured for each sample.*

|                     | Average NP diameter |
|---------------------|---------------------|
| 1 <sup>st</sup> day | 1.7 ± 0.3 nm        |
| 5 <sup>th</sup>     | 1.6 ± 0.3 nm        |
| 10 <sup>th</sup>    | 1.6 ± 0.3 nm        |

Figure S1 and Table S1 present the NP size of NA-Pt NPs estimated from particle size distributions that were determined from TEM micrographs. No change in particle size upon activation was identified. The dispersion (ratio of number of surface atoms to total number of atoms) of the NPs is 0.58.

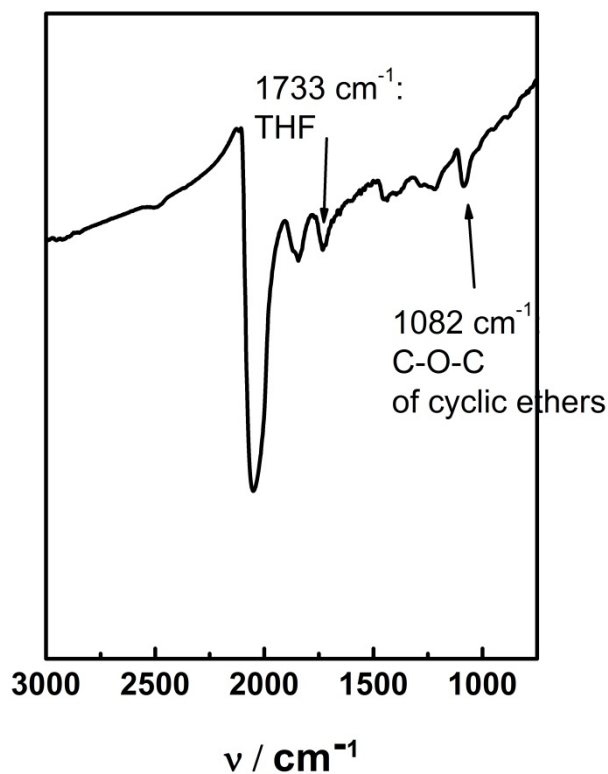

*Figure S2: Transmission-IR spectrum of unfunctionalized Pt NPs dispersed in THF and dried on the IR substrate before measurements.*

Figure S2 displays the IR spectrum of unfunctionalized Pt NPs dispersed in THF. The two marked vibrations at  $1733$  and  $1082 \text{ cm}^{-1}$  are assigned to THF.
